# Supplementary material
Source: publisher site journal article supplement (https://www.spandidos-publications.com/6966/downloadSupplementary)
Supplement: Supplementary file 1 [file downloadSupplementary]

## Sheet: Sheet1
Table SVI. Down-regulated genes 24 h after LIPUS (low-intensity pulsed ultrasound) exposure.
Gene symbol	Fold-change	p value	TPM (Transcripts per million reads)						Gene title
			Ctr-1	Ctr-2	Ctr-3	LIPUS-1	LIPUS-2	LIPUS-3
RING1	0.175	0.001	11.132	10.012	8.845	1.418	1.567	2.365	ring finger protein 1(Ring1)
ZG16	0.22	0.006	8.004	4.048	9.309	1.923	0.109	1.679	zymogen granule protein 16(Zg16)
PTGIR	0.281	0.017	9.275	7.963	9.356	4.931	1.421	2.195	prostaglandin I2 receptor(PTGIR)
ZBTB16	0.294	0.008	2.472	6.241	3.17	0.674	0.752	1.24	zinc finger and BTB domain containing 16(ZBTB16)
EP400P1	0.296	0.045	6.902	5.435	1.624	0	1.576	0.795	EP400 pseudogene 1(EP400P1)
ADAM29	0.319	0.048	6.669	7.337	5.783	1.958	0.368	4.691	ADAM metallopeptidase domain 29(ADAM29)
TENT5C	0.343	0.039	5.292	1.852	5.186	1.873	1.071	1.023	terminal nucleotidyltransferase 5C(TENT5C)
TMEM150C	0.348	0.004	12.267	14.187	11.024	4.725	2.976	5.73	transmembrane protein 150C(TMEM150C)
DGCR2	0.349	0.001	3.627	3.125	2.872	1.071	0.243	1.288	DiGeorge syndrome critical region gene 2(Dgcr2)
ADGRB1	0.379	0.016	4.23	3.486	1.774	1.291	0.614	1.103	adhesion G protein-coupled receptor B1(Adgrb1)
ZNF157	0.387	0.024	4.7	5.678	3.1	2.729	1.444	1.214	zinc finger protein 157(ZNF157)
GPR18	0.387	0.027	8.841	5.968	8.256	2.804	1.819	4.95	G protein-coupled receptor 18(GPR18)
PADI4	0.394	0.001	6	6.677	6.218	2.086	2.978	2.455	peptidyl arginine deiminase, type IV(Padi4)
VHA55	0.395	0.038	4.406	4.584	3.392	1.397	3.016	0.359	Vacuolar H[+]-ATPase 55kD subunit(Vha55)
MSS51	0.397	0.011	1.706	3.865	2.588	1.064	0.733	0.894	MSS51 mitochondrial translational activator(MSS51)
GABBR1	0.397	0.005	3.733	2.726	2.368	0.376	0.264	1.509	gamma-aminobutyric acid type B receptor subunit 1(GABBR1)
MAMLD1	0.414	0.021	4.542	2.196	3.723	0.754	1.649	1.593	mastermind like domain containing 1(MAMLD1)
LRRN1	0.423	0.004	4.554	2.811	4.451	1.511	1.889	1.514	leucine rich repeat neuronal 1(LRRN1)
STOX1	0.426	0.043	2.19	4.143	5.046	1.013	1.763	1.977	storkhead box 1(Stox1)
BEND5	0.428	0.042	5.726	5.78	5.702	2.533	1.391	4.211	BEN domain containing 5(BEND5)
FMN1	0.437	0.041	1.636	4.135	3.569	0.821	1.373	1.465	formin 1(Fmn1)
CHD3	0.44	0.032	17.318	21.194	21.515	12.043	5.053	11.04	chromodomain helicase DNA binding protein 3(CHD3)
RBL2	0.444	0.023	2.866	2.172	4.329	1.356	0.615	1.736	RB transcriptional corepressor like 2(RBL2)
SLC22A13	0.444	0.011	2.176	2.073	3.619	1.405	1.019	0.533	solute carrier family 22 (organic cation transporter), member 13(Slc22a13)
KCNH5	0.445	0.001	2.148	2.683	2.596	0.632	1.322	0.532	potassium voltage-gated channel subfamily H member 5(KCNH5)
SEMA4G	0.462	0.037	7.588	6.966	10.973	4.856	2.369	4.964	semaphorin 4G(SEMA4G)
OARD1	0.466	0.004	2.657	2.534	1.699	0.867	0.296	1.157	O-acyl-ADP-ribose deacylase 1(OARD1)
RABL2B	0.466	0.017	1.578	2.712	3.029	0.464	0.54	1.314	RAB, member of RAS oncogene family like 2B(RABL2B)
IL20RB	0.467	0.017	4.212	3.189	2.672	1.863	1.087	1.809	interleukin 20 receptor subunit beta(IL20RB)
EPHX4	0.482	0.038	7.007	6.55	7.68	4.28	2.009	4.578	epoxide hydrolase 4(Ephx4)
MSLNL	0.483	0.03	17.799	20.668	30.848	11.113	7.778	14.765	mesothelin-like(Mslnl)
SLC16A2	0.487	0.028	2.934	4.686	3.062	1.621	1.252	2.398	solute carrier family 16 member 2(SLC16A2)
LINGO1	0.49	0.001	2.419	2.126	2.702	1.271	1.177	1.091	leucine rich repeat and Ig domain containing 1(lingo1)
ACTL6B	0.49	0.05	1.833	2.075	3.791	1.7	0	0.583	actin-like 6B(Actl6b)
ANO7	0.496	0.005	2.522	1.623	2.318	0.956	1.157	0.703	anoctamin 7(Ano7)
MN1	0.504	0.046	2.417	3.558	4.68	2.113	1.193	2.049	meningioma 1(Mn1)
BTNL8	0.505	0.022	11.085	5.778	7.17	4.175	3.264	4.34	butyrophilin like 8(BTNL8)
VPS13C	0.508	0.026	53.864	52.703	48.756	26.536	17.844	38.248	vacuolar protein sorting 13 homolog C(VPS13C)
BPTF	0.514	0.014	20.974	24.546	29.65	11.08	10.832	17.315	bromodomain PHD finger transcription factor(BPTF)
DPEP3	0.516	0.044	3.586	3.527	2.055	1.082	1.906	1.736	dipeptidase 3(Dpep3)
ARID4B	0.518	0.041	20.272	20.882	25.718	11.85	7.518	17.016	AT rich interactive domain 4B (RBP1-like)(Arid4b)
ATP8A2	0.519	0.025	5.481	5.251	3.001	1.944	2.362	2.623	ATPase, aminophospholipid transporter-like, class I, type 8A, member 2(Atp8a2)
ACACB	0.52	0.01	4.006	5.199	5.913	2.655	2.093	3.122	acetyl-Coenzyme A carboxylase beta(Acacb)
NEXMIF	0.522	0.021	2.855	1.571	1.567	0.998	0.319	0.904	neurite extension and migration factor(Nexmif)
SOX11.S	0.527	0.015	3.153	2.031	2.375	1.063	1.633	1.284	SRY-box 11 S homeolog(sox11.S)
RBM10	0.535	0.008	8.733	7.203	7.749	4.823	3.196	4.851	RNA binding motif protein 10(RBM10)
CLN6	0.536	0.019	4.641	2.908	3.499	2.31	2.077	1.514	CLN6 transmembrane ER protein(CLN6)
ACAD11	0.537	0.014	9.962	7.71	11.601	5.576	4.078	6.075	acyl-CoA dehydrogenase family, member 11(Acad11)
PNMA1	0.539	0.009	2.801	2.076	2.094	1.311	0.243	1.457	PNMA family member 1(PNMA1)
GNPAT	0.541	0.001	6.118	5.765	5.872	3.005	3	3.628	glyceronephosphate O-acyltransferase(GNPAT)
SPHKAP	0.541	0.003	1.515	2.213	1.887	0.494	0.423	0.462	SPHK1 interactor, AKAP domain containing(sphkap)
TRIM46	0.544	0.049	4.074	2.245	2.38	1.52	1.169	1.968	tripartite motif-containing 46(Trim46)
U88	0.553	0.04	1.882	1.884	3.25	1.014	1.226	1.565	Uncharacterized protein U88(U88)
CNTN1	0.556	0.038	1.525	2.83	1.466	0.932	0.999	1.088	contactin 1(CNTN1)
SETD1BA	0.557	0.016	25.83	28.171	24.908	13.899	11.391	19.762	SET domain containing 1B, histone lysine methyltransferase a(setd1ba)
ZNF469	0.558	0.021	13.93	19.258	13.924	7.701	7.337	11.494	zinc finger protein 469(ZNF469)
HPS1	0.56	0.018	2.797	3.7	3.54	2.296	1.408	1.989	Hybrid PKS-NRPS synthetase 1(hps1)
GRIP1	0.561	0.001	3.741	3.985	3.851	2.261	2.164	2.07	glutamate receptor interacting protein 1(Grip1)
POL	0.563	0.036	2.565	2.173	1.47	0.178	0.212	1.461	Retrovirus-related Pol polyprotein from transposon gypsy(pol)
ACTN2	0.563	0.048	4.822	7.448	5.941	2.988	4.881	2.615	actinin alpha 2(ACTN2)
MAP3K12	0.564	0.039	1.37	1.714	2.758	0	1.164	0.171	mitogen-activated protein kinase kinase kinase 12(MAP3K12)
STS	0.565	0.044	6.737	6.543	7.812	3.924	2.761	5.747	steroid sulfatase(STS)
RCOR3	0.567	0.038	1.981	2.86	2.437	1.36	0.774	1.855	REST corepressor 3(RCOR3)
UBASH3B	0.573	0.004	19.525	17.427	15.324	8.744	9.608	11.7	ubiquitin associated and SH3 domain containing, B(Ubash3b)
PREX1	0.578	0.04	14.463	14.235	23.515	9.531	8.037	12.186	phosphatidylinositol-3,4,5-trisphosphate-dependent Rac exchange factor 1(Prex1)
KMT2B	0.578	0.016	62.356	68.665	53.359	34.256	28.42	45.346	lysine (K)-specific methyltransferase 2B(Kmt2b)
RORB	0.579	0.013	22.525	31.133	26.148	18.073	12.26	16.048	RAR-related orphan receptor B(Rorb)
B9D1	0.58	0.002	5.074	5.852	4.462	2.828	2.779	3.287	B9 protein domain 1(b9d1)
DACH2	0.585	0.046	1.629	2.408	2.138	0.718	0.759	1.682	dachshund family transcription factor 2(Dach2)
CHST3	0.587	0.047	3.685	2.577	2.843	1.594	2.501	1.371	carbohydrate sulfotransferase 3(CHST3)
COL27A1B	0.589	0.04	3.696	4.774	5.834	2.266	2.532	3.672	collagen, type XXVII, alpha 1b(col27a1b)
IPO8	0.589	0.009	15.26	14.755	19.428	9.56	11.449	8.186	importin 8(IPO8)
ENOSF1	0.59	0.031	9.701	8.5	7.005	6.251	3.673	5.157	enolase superfamily member 1(ENOSF1)
FBXO21	0.595	0.01	3.62	3.291	3.377	2.618	1.852	1.747	F-box protein 21(FBXO21)
CDC14B	0.595	0.046	4.071	5.133	6.063	3.995	2.974	2.249	cell division cycle 14B(CDC14B)
SIAE	0.596	0.037	5.204	4.817	5.556	4.016	2.167	3.384	sialic acid acetylesterase(Siae)
GBF1	0.599	0.028	25.409	33.469	35.985	19.823	14.525	22.815	golgi brefeldin A resistant guanine nucleotide exchange factor 1(GBF1)
PIK3R2	0.599	0.033	9.744	10.778	10.961	6.62	4.526	8.264	phosphoinositide-3-kinase regulatory subunit 2(PIK3R2)
WWC2	0.6	0.049	7.375	10.151	7.472	6	3.487	5.773	WW and C2 domain containing 2(WWC2)
MMD2	0.602	0.025	7.955	8.391	7.684	4.169	4.033	6.666	monocyte to macrophage differentiation associated 2(MMD2)
L1CAMA	0.606	0.001	5.871	5.473	6.071	3.219	3.336	4.043	L1 cell adhesion molecule, paralog a(l1cama)
SFI1	0.608	0.041	3.187	2.392	1.944	1.863	1.456	1.227	SFI1 centrin binding protein(SFI1)
EBF3	0.608	0.001	6.024	5.003	5.805	3.231	3.747	3.254	early B cell factor 3(Ebf3)
EVI5L	0.609	0.003	2.404	3.068	2.725	1.494	1.733	1.756	ecotropic viral integration site 5 like(EVI5L)
VAPB	0.61	0.006	12.321	17.211	14.633	8.512	8.435	9.823	VAMP associated protein B and C(VAPB)
APBA3	0.61	0.005	3.643	4.741	3.577	2.177	2.592	2.489	amyloid beta precursor protein binding family A member 3(APBA3)
PARP3	0.612	0.014	21.847	17.152	18.012	14.43	9.92	10.792	poly (ADP-ribose) polymerase family, member 3(Parp3)
TMEM59L	0.613	0.013	3.019	4.042	3.529	2.35	2.392	1.762	transmembrane protein 59-like(Tmem59l)
SRRM1	0.616	0.039	47.928	59.507	47.028	29.643	24.664	42.891	serine and arginine repetitive matrix 1(SRRM1)
SGO1.L	0.618	0.007	3.465	2.964	3.82	2.371	1.8	2.165	shugoshin 1 L homeolog(sgo1.L)
SARAF	0.618	0.031	83.599	93.442	90.651	42.439	52.994	74.21	store-operated calcium entry-associated regulatory factor(saraf)
TMX4	0.619	0.02	7.567	5.356	6.527	3.378	4.83	3.845	thioredoxin-related transmembrane protein 4(Tmx4)
KIAA0513	0.619	0.001	3.571	3.617	3.483	2.146	2.099	2.374	KIAA0513(KIAA0513)
TAPT1B	0.621	0.019	27.425	20.36	21.522	16.767	11.61	14.76	transmembrane anterior posterior transformation 1b(tapt1b)
DVL1	0.622	0.03	11.933	12.167	11.509	7.687	5.485	9.537	dishevelled segment polarity protein 1(DVL1)
HMCN1	0.624	0.02	5.05	5.392	7.184	3.216	3.382	4.36	hemicentin 1(Hmcn1)
ZFX.S	0.624	0.04	51.693	48.622	56.37	39.297	23.149	37.79	zinc finger protein X-linked S homeolog(zfx.S)
ATP2B2	0.626	0.046	12.592	18.01	13.106	8.998	7.007	11.546	Plasma membrane calcium-transporting ATPase 2(atp2b2)
GLIPR2	0.629	0.031	31.733	33.609	27.71	22.472	14.411	22.685	GLI pathogenesis-related 2(Glipr2)
HOXC8A	0.631	0.044	4.615	5.362	4.65	2.479	4.291	2.722	homeobox C8a(hoxc8a)
LRP1B	0.632	0.029	10.179	9.297	8.243	6.891	4.388	6.521	low density lipoprotein-related protein 1B(Lrp1b)
ACOX3	0.634	0.035	2.671	1.93	2.849	1.729	1.737	1.244	acyl-CoA oxidase 3, pristanoyl(ACOX3)
MMP17	0.635	0.03	6.317	4.165	4.508	3.684	2.983	2.761	matrix metallopeptidase 17(Mmp17)
NFAT5	0.635	0.024	14.406	16.588	13.797	9.095	7.678	12.102	nuclear factor of activated T-cells 5(Nfat5)
PITPNM2	0.636	0.045	25.946	22.187	23.408	15.673	11.109	19.898	phosphatidylinositol transfer protein, membrane-associated 2(Pitpnm2)
ERBB3	0.637	0.005	67.33	57.421	60.758	39.812	34.003	44.747	erb-b2 receptor tyrosine kinase 3(ERBB3)
ADD1	0.637	0.007	38.085	43.456	34.8	28.165	24.674	21.39	adducin 1(ADD1)
LMO2	0.637	0.036	1.906	1.73	2.539	1.576	1.056	1.299	LIM domain only 2 (rhombotin-like 1)(lmo2)
PTPRH	0.637	0.011	4.612	6.13	5.644	3.686	2.944	3.801	protein tyrosine phosphatase, receptor type, H(Ptprh)
PTCHD3	0.638	0.004	4.635	4.377	3.535	2.786	2.477	2.7	patched domain containing 3(Ptchd3)
DGKA	0.638	0.007	14.644	12.845	15.436	8.751	8.042	10.72	diacylglycerol kinase alpha(DGKA)
KMT2D	0.64	0.009	11.605	10.506	13.749	7.861	6.576	8.497	lysine methyltransferase 2D(KMT2D)
ANKH	0.641	0.021	7.562	10	6.794	4.753	4.81	5.927	ANKH inorganic pyrophosphate transport regulator(Ankh)
BTC	0.643	0.026	2.304	1.923	2.753	1.483	1.761	1.241	betacellulin, epidermal growth factor family member(Btc)
USP20	0.644	0.009	17.84	13.287	15.544	9.602	9.094	11.264	ubiquitin specific peptidase 20(usp20)
CDK15	0.645	0.035	2.563	3.522	2.211	1.521	1.792	1.965	cyclin-dependent kinase 15(cdk15)
FAM219AA	0.646	0.045	6.701	5.787	8.534	4.23	3.71	5.674	family with sequence similarity 219 member Aa(fam219aa)
KLHL42	0.646	0.038	1.643	2.4	1.718	1.264	0.933	1.444	kelch-like 42(Klhl42)
RAPH1	0.646	0.035	47.971	66.225	64.68	33.785	34.146	48.045	Ras association (RalGDS/AF-6) and pleckstrin homology domains 1(RAPH1)
IDS	0.65	0.023	1.945	1.217	1.541	0.979	0.427	0.766	iduronate 2-sulfatase(IDS)
CACNG6	0.65	0.013	3.095	3.041	2.618	1.541	2.099	2.093	calcium voltage-gated channel auxiliary subunit gamma 6(CACNG6)
POGLUT3	0.651	0.043	5.805	5.646	4.975	3.865	2.628	4.435	protein O-glucosyltransferase 3(Poglut3)
ALOX12	0.653	0.031	2.759	1.876	2.816	1.816	1.49	1.499	arachidonate 12-lipoxygenase, 12S type(Alox12)
PABIR3	0.655	0.001	10.87	9.87	11.357	7.154	6.882	6.964	PABIR family member 3(PABIR3)
HEBP1	0.658	0.001	3.37	3.247	3.736	2.177	2.271	2.36	heme binding protein 1(HEBP1)
TBC1D9	0.659	0.003	12.253	13.906	11.692	7.868	7.864	9.216	TBC1 domain family, member 9(Tbc1d9)
SNX10A	0.66	0.043	10.408	12.972	8.067	5.933	7.795	6.77	sorting nexin 10a(snx10a)
AMMECR1	0.66	0.009	14.783	17.922	17.584	12.807	9.702	10.795	AMMECR nuclear protein 1(AMMECR1)
SH3GL1	0.661	0.025	39.497	28.89	38.268	26.463	19.688	24.251	SH3 domain containing GRB2 like 1, endophilin A2(SH3GL1)
LIPE	0.662	0.033	10.453	11.17	14.749	8.429	6.526	9.066	lipase E, hormone sensitive type(LIPE)
MCC	0.663	0.025	21.09	20.981	23.59	13.909	11.884	18.392	MCC regulator of WNT signaling pathway(MCC)
CELF3A	0.666	0.022	5.885	6.266	6.178	4.192	3.237	4.968	cugbp, Elav-like family member 3a(celf3a)
TRHDE	0.667	0.004	6.321	6.895	7	4.151	5.171	4.221	thyrotropin-releasing hormone degrading enzyme(Trhde)
PTPRD	0.668	0.036	32.413	36.418	29.946	22.799	17.082	27.057	protein tyrosine phosphatase receptor type D(PTPRD)
MCM9	0.669	0.046	2.087	1.303	1.322	1.074	0.408	0.783	minichromosome maintenance 9 homologous recombination repair factor(mcm9)
USP13	0.67	0.037	1.336	2.004	1.265	0.785	1.019	0.856	ubiquitin specific peptidase 13(usp13)
F54H12.3	0.671	0.048	2.997	2.336	2.596	1.47	1.607	2.323	Putative uncharacterized transposon-derived protein F54H12.3(F54H12.3)
DEDD2	0.671	0.026	10.628	9.97	11.127	6.927	5.775	8.909	death effector domain-containing DNA binding protein 2(Dedd2)
EFS	0.672	0.038	10.846	9.869	8.534	7.881	5.109	6.882	embryonal Fyn-associated substrate(EFS)
ACER2	0.676	0.046	17.186	17.19	16.501	12.273	8.574	14.308	alkaline ceramidase 2(ACER2)
TRIM32	0.676	0.049	3.372	5.086	3.483	2.33	2.578	3.08	tripartite motif containing 32(TRIM32)
MYNN.L	0.678	0.034	12.763	15.432	12.417	8.886	11.366	7.53	myoneurin L homeolog(mynn.L)
IRAG1	0.679	0.04	5.084	3.313	4.024	2.413	3.096	2.838	inositol 1,4,5-triphosphate receptor associated 1(IRAG1)
ARHGEF10L	0.679	0.002	12.557	13.129	11.205	8.062	8.009	8.964	Rho guanine nucleotide exchange factor (GEF) 10-like(Arhgef10l)
USP31	0.679	0.042	8.838	8.118	8.639	6.903	4.353	6.465	ubiquitin specific peptidase 31(USP31)
POGZ	0.679	0.006	24.956	29.851	25.915	20.724	17.18	17.011	pogo transposable element with ZNF domain(Pogz)
XPC	0.68	0.011	1.733	1.233	1.504	0.969	0.842	1.009	xeroderma pigmentosum, complementation group C(Xpc)
SLC39A9.L	0.681	0.028	7.693	9.074	9.226	7.316	4.954	5.617	solute carrier family 39 member 9 L homeolog(slc39a9.L)
PIP5K1B	0.683	0.048	9.084	10.663	14.298	7.812	6.654	8.487	phosphatidylinositol-4-phosphate 5-kinase type 1 beta(PIP5K1B)
CC2D1B.L	0.684	0.037	19.533	17.743	17.234	10.804	10.916	16.176	coiled-coil and C2 domain containing 1B L homeolog(cc2d1b.L)
SPIN1	0.684	0.029	7.854	6.694	5.909	4.658	3.891	5.48	spindlin 1(SPIN1)
CLIP4	0.684	0.048	2.875	3.027	2.719	2.421	1.482	2.116	CAP-Gly domain containing linker protein family member 4(CLIP4)
POU2F1	0.685	0.029	21.958	24.438	22.789	16.229	12.561	19.248	POU class 2 homeobox 1(POU2F1)
HDAC11	0.686	0.004	1.724	1.391	1.409	1.091	0.754	0.788	histone deacetylase 11(HDAC11)
LRFN5	0.686	0.003	1.611	1.283	1.497	0.404	0.761	0.418	leucine rich repeat and fibronectin type III domain containing 5(Lrfn5)
TTC21A.L	0.687	0.011	1.379	1.518	1.77	1.204	0.822	0.555	tetratricopeptide repeat domain 21A L homeolog(ttc21a.L)
MIPOL1	0.688	0.03	2.401	2.67	2.811	2.283	1.57	1.634	mirror-image polydactyly 1(MIPOL1)
COQ8AA	0.688	0.004	28.262	24.823	23.636	19.464	16.322	17.024	coenzyme Q8A, genome duplicate a(coq8aa)
IFFO2	0.691	0.029	15.369	11.663	12.264	9.999	7.493	9.66	intermediate filament family orphan 2(Iffo2)
PLLP	0.691	0.034	7.816	8.411	6.489	6.316	4.394	5.064	plasmolipin(PLLP)
LHX2	0.691	0.032	1.31	1.24	1.869	0.867	0	0	LIM homeobox protein 2(Lhx2)
MFSD2AB	0.692	0.031	69.873	70.54	62.784	47.013	37.821	57.638	major facilitator superfamily domain containing 2ab(mfsd2ab)
CAMKK2	0.693	0.028	3.404	4.223	3.878	2.558	2.249	3.219	calcium/calmodulin-dependent protein kinase kinase 2, beta(Camkk2)
EPB41L1	0.694	0.002	10.489	10.596	10.212	8.129	6.669	7.001	erythrocyte membrane protein band 4.1 like 1(EPB41L1)
UACA	0.697	0.036	41.025	37.825	44.944	34.996	23.113	29.155	uveal autoantigen with coiled-coil domains and ankyrin repeats(Uaca)
FLRT2	0.697	0.007	6.705	7.621	7.931	5.557	4.55	5.426	fibronectin leucine rich transmembrane protein 2(FLRT2)
RHOBTB3	0.698	0.047	1.144	1.381	1.857	0.581	0.739	0.758	Rho related BTB domain containing 3(RHOBTB3)
CDH6	0.7	0.005	4.855	4.688	4.986	3.914	3.148	3.164	cadherin 6(Cdh6)
SPNS3	0.703	0.045	4.591	3.881	3.536	3.185	2.234	3.078	spinster homolog 3 (Drosophila)(spns3)
CCAR1	0.705	0.043	42.502	44.343	39.853	30.714	23.396	36.554	cell division cycle and apoptosis regulator 1(Ccar1)
RRAGD	0.705	0.01	2.55	3.198	2.836	1.806	2.207	2.03	Ras related GTP binding D(RRAGD)
FAM222A	0.705	0.004	1.509	1.532	1.511	1.224	0.765	0.808	family with sequence similarity 222 member A(FAM222A)
MAP4K2	0.706	0.027	19.386	19.318	22.311	17.106	11.927	14.432	mitogen-activated protein kinase kinase kinase kinase 2(MAP4K2)
NXPE3	0.713	0.017	6.542	7.08	5.993	5.388	4.016	4.653	neurexophilin and PC-esterase domain family member 3(NXPE3)
ZNF658	0.714	0.016	1.658	1.794	1.495	1.292	0.521	1.25	zinc finger protein 658(ZNF658)
MIS18BP1	0.714	0.028	2.193	2.978	2.382	1.786	1.589	1.993	MIS18 binding protein 1(MIS18BP1)
ABO	0.715	0.026	22.292	27.299	27.368	16.635	16.876	21.697	ABO, alpha 1-3-N-acetylgalactosaminyltransferase and alpha 1-3-galactosyltransferase(ABO)
NEK8	0.716	0.034	3.69	3.252	4.448	2.938	2.317	2.878	NIMA-related kinase 8(nek8)
PIP4P1B	0.716	0.037	9.241	8.214	10.99	7.492	5.681	7.208	phosphatidylinositol-4,5-bisphosphate 4-phosphatase 1b(pip4p1b)
USP6NL	0.717	0.015	17.81	15.37	17.679	10.884	11.554	14.18	USP6 N-terminal like(Usp6nl)
MASP1	0.72	0.016	3.696	3.316	2.776	2.491	2.176	2.345	MBL associated serine protease 1(MASP1)
KIF13A	0.721	0.047	4.398	6.577	5.583	3.787	4.356	3.665	kinesin family member 13A(Kif13a)
SENP7	0.721	0.047	12.523	9.4	9.838	7.696	8.803	6.412	SUMO specific peptidase 7(SENP7)
FGD4	0.722	0.001	58.592	60.485	61.106	40.725	44.12	45.322	FYVE, RhoGEF and PH domain containing 4(Fgd4)
SCIN	0.722	0.042	447.377	392.46	414.047	354.498	240.037	321.712	scinderin(SCIN)
KPNA5	0.724	0.037	34.734	34.195	46.96	29.276	24.8	29.176	karyopherin alpha 5 (importin alpha 6)(kpna5)
GGT1	0.725	0.019	5.288	5.071	5.183	3.252	4.495	3.626	gamma-glutamyltransferase 1(Ggt1)
UHMK1	0.726	0.006	3.455	4.178	3.828	2.797	2.559	2.955	U2AF homology motif kinase 1(UHMK1)
TMEM267	0.727	0.034	4.951	5.786	5.504	3.684	3.417	4.806	transmembrane protein 267(tmem267)
KDM7AB	0.727	0.048	24.487	26.866	28.13	16.556	17.626	24.341	lysine (K)-specific demethylase 7Ab(kdm7ab)
ABTB1	0.729	0.047	5.137	6.785	4.978	4.415	3.49	4.357	ankyrin repeat and BTB domain containing 1(Abtb1)
MTX3	0.73	0.042	4.008	4.737	3.684	2.974	3.555	2.576	metaxin 3(mtx3)
GNAQ	0.73	0.043	38.158	35.216	33.095	30.308	20.809	27.458	guanine nucleotide binding protein, alpha q polypeptide(Gnaq)
PDE8B	0.73	0.028	3.716	4.192	3.015	2.64	2.449	2.829	phosphodiesterase 8B(Pde8b)
ZNF571	0.73	0.031	2.554	3.042	3.123	1.956	1.917	2.519	zinc finger protein 571(ZNF571)
CRYBG1	0.732	0.009	113.205	105	118.783	85.436	72.255	89.851	crystallin beta-gamma domain containing 1(CRYBG1)
NUF2	0.734	0.041	2.57	2.047	2.071	1.728	1.825	1.365	UF2 component of NDC80 kinetochore complex(nuf2)
CLCN7	0.735	0.009	10.414	9.77	10.332	6.845	7.069	8.619	chloride channel, voltage-sensitive 7(Clcn7)
PDK3	0.738	0.03	21.482	20.458	26.081	16.09	14.993	19.112	pyruvate dehydrogenase kinase 3(PDK3)
DOP1B	0.739	0.037	5.583	5.949	6.104	4.332	3.611	5.222	DOP1 leucine zipper like protein B(DOP1B)
SLC5A3	0.739	0.011	14.562	12.903	14.784	9.27	10.444	11.589	solute carrier family 5 member 3(SLC5A3)
NT5C2	0.741	0.014	55.766	68.068	57.793	48.506	40.238	45.65	5'-nucleotidase, cytosolic II(NT5C2)
OGA	0.742	0.027	32.757	29.478	33.407	24.212	19.978	27.261	O-GlcNAcase(OGA)
PPP2R1A	0.743	0.028	50.595	66.169	51.486	38.961	39.938	45.512	protein phosphatase 2 scaffold subunit Aalpha(PPP2R1A)
LIMCH1.L	0.744	0.031	6.905	8.536	7.547	6.541	4.932	5.672	LIM and calponin homology domains 1 L homeolog(limch1.L)
PAPOLB	0.744	0.007	4.054	4.872	4.356	3.412	3.418	3.041	poly(A) polymerase beta(PAPOLB)
LLGL1	0.745	0.009	9.619	8.646	9.868	6.931	6.314	7.756	LLGL scribble cell polarity complex component 1(LLGL1)
RNF225	0.747	0.026	14.907	11.908	14.213	11.543	9.296	9.82	ring finger protein 225(RNF225)
TMEM187	0.75	0.021	2.907	2.514	2.576	1.781	1.937	2.303	transmembrane protein 187(TMEM187)
AHNAK	0.751	0.024	2060.55	2189.21	1923.6	1432.82	1408.38	1820.3	AHNAK nucleoprotein(AHNAK)
BRWD1	0.752	0.037	20.9	14.808	18.67	13.156	13.198	14.124	bromodomain and WD repeat domain containing 1(Brwd1)
NHLRC3	0.752	0.018	8.531	9.686	9.655	7.87	7.017	6.141	NHL repeat containing 3(NHLRC3)
NDFIP1	0.752	0.011	116.129	106.175	100.527	76.627	75.526	91.066	Nedd4 family interacting protein 1(Ndfip1)
L1TD1	0.753	0.047	4.538	4.684	4.329	3.624	2.75	3.943	LINE-1 type transposase domain containing 1(L1td1)
DDX42.L	0.754	0.008	30.749	32.916	36.509	26.203	23.003	26.24	DEAD-box helicase 42 L homeolog(ddx42.L)
PNPLA4	0.755	0.01	1.469	1.416	1.364	0.97	1.22	0.926	patatin like phospholipase domain containing 4(PNPLA4)
SLX4	0.755	0.007	6.13	5.947	5.273	4.74	4.266	4.095	SLX4 structure-specific endonuclease subunit homolog (S. cerevisiae)(Slx4)
DLG1	0.757	0.038	28.836	31.572	30.818	24.734	18.91	25.977	discs large MAGUK scaffold protein 1(DLG1)
SLC9B2	0.757	0.048	7.78	10.236	8.21	6.06	7.564	6.186	solute carrier family 9 member B2(slc9b2)
PCMTD1	0.758	0.014	7.526	6.401	6.494	5.143	4.674	5.663	protein-L-isoaspartate (D-aspartate) O-methyltransferase domain containing 1(PCMTD1)
CAST	0.759	0.039	58.546	56.734	59.367	44.916	36.83	52.202	calpastatin(CAST)
LDLRAP1.L	0.76	0.048	38.3	42.554	39.436	27.901	37.402	26.999	low density lipoprotein receptor adaptor protein 1 L homeolog(ldlrap1.L)
DCAF11	0.762	0.001	17.884	18.909	20.188	13.893	14.706	14.804	DDB1 and CUL4 associated factor 11(Dcaf11)
GLT1D1	0.763	0.012	1.503	1.182	1.268	0.953	0.584	0.93	glycosyltransferase 1 domain containing 1(GLT1D1)
PARD3	0.763	0.039	37.931	40.915	44.294	36.317	26.664	31.59	par-3 family cell polarity regulator(PARD3)
ABCA2	0.764	0.034	12.351	16.05	13.568	11.127	9.478	11.359	ATP-binding cassette, sub-family A (ABC1), member 2(Abca2)
TTC14	0.764	0.007	6.036	7.122	6.838	5.255	4.745	5.254	tetratricopeptide repeat domain 14(TTC14)
PKP4	0.764	0.046	79.029	103.686	84.908	70.389	59.54	73.991	plakophilin 4(Pkp4)
SBF2	0.765	0.012	36.102	43.126	37.662	28.295	28.45	32.567	SET binding factor 2(Sbf2)
DYNC1LI1	0.766	0.021	8.877	7.99	7.437	6.001	5.649	6.991	dynein cytoplasmic 1 light intermediate chain 1(Dync1li1)
TNFAIP1	0.766	0.039	11.692	12.212	12.904	7.992	11.073	9.373	TNF alpha induced protein 1(TNFAIP1)
ITPRID1	0.767	0.046	12.653	13.871	11.454	10.249	8.162	10.843	ITPR interacting domain containing 1(Itprid1)
LRSAM1	0.768	0.023	43.936	45.534	41.686	34.933	28.835	37.534	leucine rich repeat and sterile alpha motif containing 1(LRSAM1)
ZC3H11A	0.771	0.01	24.224	26.41	28.23	21.998	18.777	20.041	zinc finger CCCH-type containing 11A(ZC3H11A)
GNA11.L	0.773	0.022	17.324	16.488	16.875	13.241	11.321	14.851	guanine nucleotide binding protein (G protein), alpha 11 (Gq class) L homeolog(gna11.L)
PPM1D	0.774	0.008	11.406	11.874	11.01	7.917	9.535	9.169	protein phosphatase, Mg2+/Mn2+ dependent 1D(PPM1D)
TGOLN2	0.776	0.022	7.991	7.32	8.516	5.635	5.91	6.981	trans-golgi network protein 2(Tgoln2)
FAM126B	0.776	0.044	8.679	8.064	6.51	6.459	5.965	5.526	family with sequence similarity 126 member B(FAM126B)
ARMC9	0.776	0.016	3.492	3.821	4.442	2.98	2.983	3.118	armadillo repeat containing 9(armc9)
LIN37	0.776	0.046	19.061	17.537	22.007	16.665	15.763	13.1	lin-37 DREAM MuvB core complex component(LIN37)
LRRC57	0.777	0.038	13.59	16.635	13.259	10.06	12.298	11.364	leucine rich repeat containing 57(lrrc57)
GPM6B	0.778	0.032	58.395	66.56	67.44	51.278	43.299	55.574	glycoprotein m6b(Gpm6b)
TMEM8B	0.778	0.039	8.95	10.169	11.702	7.221	8.083	8.598	transmembrane protein 8B(TMEM8B)
TMEM169	0.779	0.012	2.896	2.312	2.61	2.008	2.015	2.039	transmembrane protein 169(Tmem169)
PHC2	0.78	0.035	25.133	29.794	32.696	22.727	20.956	24.377	polyhomeotic homolog 2(PHC2)
FAM120A	0.783	0.032	18.068	17.574	17.934	12.893	12.821	16.558	family with sequence similarity 120A(FAM120A)
TESK2	0.785	0.031	23.803	29.507	24.098	18.656	20.109	21.825	testis associated actin remodelling kinase 2(Tesk2)
HS3ST3B1	0.786	0.005	14.55	13.632	14.751	12.057	10.398	11.338	heparan sulfate (glucosamine) 3-O-sulfotransferase 3B1(Hs3st3b1)
ABHD2A	0.787	0.006	7.983	9.138	8.955	6.693	6.564	7.237	abhydrolase domain containing 2, acylglycerol lipase a(abhd2a)
ZNF732	0.79	0.001	30.365	29.458	31.957	23.671	24.698	24.129	zinc finger protein 732(ZNF732)
TBC1D31	0.79	0.021	1.195	1.459	1.161	0.837	0.921	0.868	TBC1 domain family member 31(tbc1d31)
GON4L	0.791	0.017	25.965	26.937	25.521	20.137	18.741	23.378	gon-4 like(GON4L)
YBIK	0.791	0.03	2.81	2.892	2.551	2.338	1.886	2.323	beta-aspartyl-peptidase(ybiK)
SUZ12A	0.792	0.037	26.379	29.699	29.535	22.078	20.081	25.961	SUZ12 polycomb repressive complex 2 subunit a(suz12a)
CHMP4B	0.795	0.028	26.86	21.999	25.528	21.118	17.997	19.954	charged multivesicular body protein 4B(chmp4b)
FBXL2	0.797	0.029	5.374	5.889	6.787	4.57	4.638	5.121	F-box and leucine rich repeat protein 2(FBXL2)
NLRP14	0.797	0.029	133.329	114.706	140.247	95.969	112.358	100.774	NLR family, pyrin domain containing 14(Nlrp14)
GDAP1	0.797	0.034	1.077	1.296	1.413	0.995	0.887	0.333	ganglioside induced differentiation associated protein 1(GDAP1)
RAB38	0.798	0.017	10.551	8.824	8.657	7.366	7.257	7.658	RAB38, member RAS oncogene family(RAB38)
STIM1	0.798	0.048	81.689	71.45	61.123	59.962	54.708	55.296	stromal interaction molecule 1(Stim1)
E2F6	0.799	0.048	10.787	13.956	13.091	10.872	9.831	9.4	E2F transcription factor 6(E2f6)
SCARF1	0.8	0.021	5.785	5.184	4.862	4.01	4.053	4.614	scavenger receptor class F member 1(SCARF1)
RELCH	0.8	0.047	35.132	41.099	38.693	31.093	26.786	34.544	RAB11 binding and LisH domain, coiled-coil and HEAT repeat containing(relch)
ARHGAP31	0.8	0.022	12.749	11.797	13.817	9.703	9.735	11.332	Rho GTPase activating protein 31(Arhgap31)
SYNE1	0.8	0.013	63.374	71.272	61.804	53.567	48.516	55.337	spectrin repeat containing, nuclear envelope 1(Syne1)
GPR137C	0.8	0.044	6.043	7.896	6.315	5.188	5.494	5.455	G protein-coupled receptor 137C(GPR137C)
FAM117B	0.8	0.027	11.264	12.235	10.952	10.193	8.193	9.388	family with sequence similarity 117, member B(Fam117b)
GNAL	0.8	0.047	14.287	13.494	16.139	12.919	10.31	12.141	G protein subunit alpha L(GNAL)
TRIM35	0.8	0.036	167.418	159.852	164.406	123.3	121.466	153.708	tripartite motif containing 35(TRIM35)
SLC31A2	0.8	0.037	8.695	11.102	9.502	8.044	7.352	8.13	solute carrier family 31 member 2(SLC31A2)
CEP128	0.8	0.028	1.98	2.377	2.492	1.86	1.794	1.846	centrosomal protein 128(CEP128)
EIF4ENIF1	0.8	0.011	14.757	16.155	15.3	11.675	12.041	13.629	eukaryotic translation initiation factor 4E nuclear import factor 1(Eif4enif1)
PCGF5A	0.8	0.037	9.923	11.694	10.818	8.518	7.93	9.77	polycomb group ring finger 5a(pcgf5a)
ZNF518B	0.8	0.009	2.272	2.275	2.274	1.927	1.657	1.938	zinc finger protein 518B(ZNF518B)
MTMR2	0.8	0.014	15.552	14.794	14.408	10.923	12.172	13.15	myotubularin related protein 2(mtmr2)
FAM214B	0.8	0.027	4.831	5.415	4.723	3.781	3.848	4.498	family with sequence similarity 214, member B(Fam214b)
SRPK1	0.8	0.009	60.066	54.142	58.523	49.182	42.993	47.702	serine/arginine-rich protein specific kinase 1(Srpk1)
TCF25	0.8	0.031	10.521	9.936	9.597	7.694	7.487	9.256	transcription factor 25 (basic helix-loop-helix)(Tcf25)
TEF	0.8	0.035	106.238	98.816	113.347	89.448	75.844	93.296	thyrotroph embryonic factor(Tef)
UBE2F	0.8	0.048	13.777	11.791	13.7	9.294	11.228	11.356	ubiquitin-conjugating enzyme E2F (putative)(ube2f)
LMCD1	0.8	0.013	7.437	6.536	7.08	5.954	5.241	5.887	LIM and cysteine-rich domains 1(Lmcd1)
DHX8	0.8	0.023	18.233	20.692	16.737	15.244	14.39	15.433	DEAH (Asp-Glu-Ala-His) box polypeptide 8(Dhx8)
ZFP521	0.8	0.001	10.861	11.574	11.174	9.001	8.788	9.551	zinc finger protein 521(Zfp521)
MDM2	0.8	0.04	33.975	40.5	43.458	32.942	32.063	30.463	MDM2 proto-oncogene(mdm2)
EDA2R	0.8	0.044	1.209	1.396	1.335	1.218	0.073	0.439	ectodysplasin A2 receptor(Eda2r)
KMT5B	0.8	0.028	25.413	28.41	25.946	22.761	19.257	23.161	lysine methyltransferase 5B(kmt5b)
ZMYM4	0.8	0.047	18.051	16.785	15.127	13.898	12.125	14.862	zinc finger, MYM-type 4(Zmym4)
PPFIA2	0.8	0.046	3.444	3.414	3.279	2.863	2.391	3.091	PTPRF interacting protein alpha 2(PPFIA2)
IHH.S	0.8	0.048	32.023	39.065	38.749	29.9	27.764	32.213	indian hedgehog S homeolog(ihh.S)
KIF16B	0.8	0.028	2.854	3.407	3.456	2.707	2.535	2.716	kinesin family member 16B(Kif16b)
SH3GL3	0.8	0.016	6.234	6.818	6.91	5.114	5.949	5.354	SH3 domain containing GRB2 like 3, endophilin A3(SH3GL3)
HOXA3A	0.8	0.038	4.808	4.992	5.537	4.396	3.74	4.491	homeobox A3a(hoxa3a)
ARHGEF7	0.8	0.039	23.96	26.615	26.288	22.828	18.579	22.026	Rho guanine nucleotide exchange factor 7(Arhgef7)
VNX1	0.8	0.016	10.895	11.911	12.182	9.146	9.226	10.448	Vnx1p(VNX1)
NEURL1	0.8	0.047	2.677	2.64	3.208	2.525	2.19	2.291	neuralized E3 ubiquitin protein ligase 1(NEURL1)
PIBF1	0.8	0.036	1.373	1.138	1.323	1.126	0.663	1.049	progesterone immunomodulatory binding factor 1(PIBF1)
SMCR8B	0.8	0.006	1.911	2.005	1.78	1.526	1.632	1.569	Smith-Magenis syndrome chromosome region, candidate 8b(smcr8b)
SPSB3	0.8	0.048	11.661	12.972	10.346	9.084	9.944	9.987	splA/ryanodine receptor domain and SOCS box containing 3(spsb3)
